# Supplementary material for: Mitotic chromosomes scale to nuclear-cytoplasmic ratio and cell size in Xenopus
Source: eLife journal article supplement (doi:10.7554/elife.84360), 2023-04-25
Supplement: supp [file elife-84360-supp-v1.zip]

**This folder contains the following source data:**

Figure 5-Source Data 1 (all data used to generate plots in Figure 5B-C, Figure 5-figure supplement 1 and 2)

Figure 5-Source Data 2 (all data used to generate plot in Figure 5D)

Figure 5-Source Data 3 (all data used to generate plot in Figure 5E)

Figure 5-Source Data 4 (all data used to generate plot in Figure 5-figure supplement 3A)

Figure 5-Source Data 5 (all data used to generate plot in Figure 5-figure supplement 3B)

Figure 5-Source Data 6 (all raw uncropped images and analysis of Western blot in Figure 5-figure supplement 4A)

- Figure 5-Source Data 6A (folder containing all raw uncropped images, grouped by Antibody and intensity of scan)
- Figure 5-Source Data 6B (annotated Western blot, related to Figure 5-Source Data 6A)
- Figure 5-Source Data 6C (Quantification of signal intensity, normalized for the highest intensity band for each frog and each stage, performed in FIJI)

Figure 5-Source Data 7 (all data used to generate plot in Figure 5-figure supplement 4B)
