# Supplementary material for: Mitotic chromosomes scale to nuclear-cytoplasmic ratio and cell size in Xenopus
Source: eLife journal article supplement (doi:10.7554/elife.84360), 2023-04-25

**Figure 5-figure supplement 3:** N/C ratio does not affect chromosome lengths of embryo chromosomes or unreplicated sperm chromosomes.

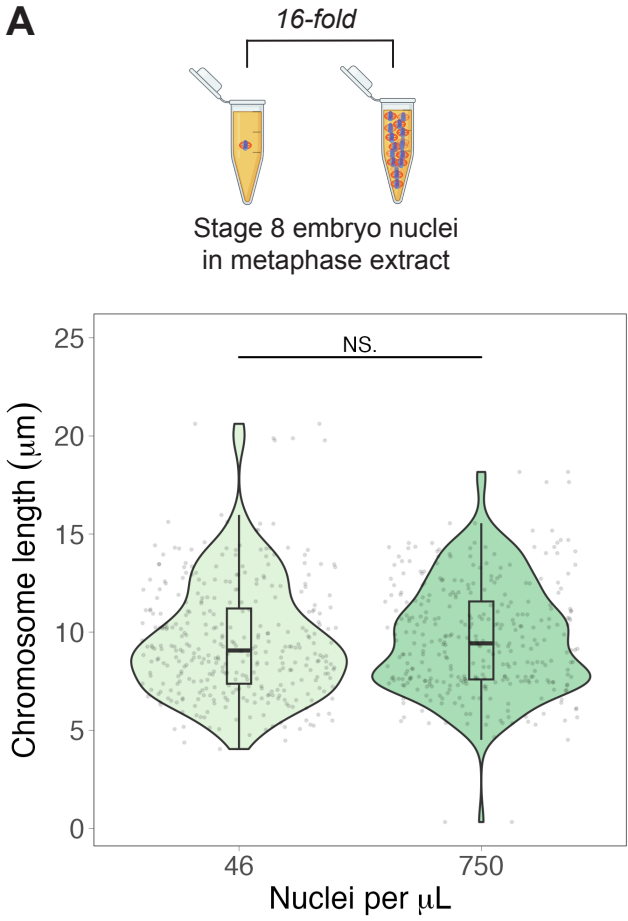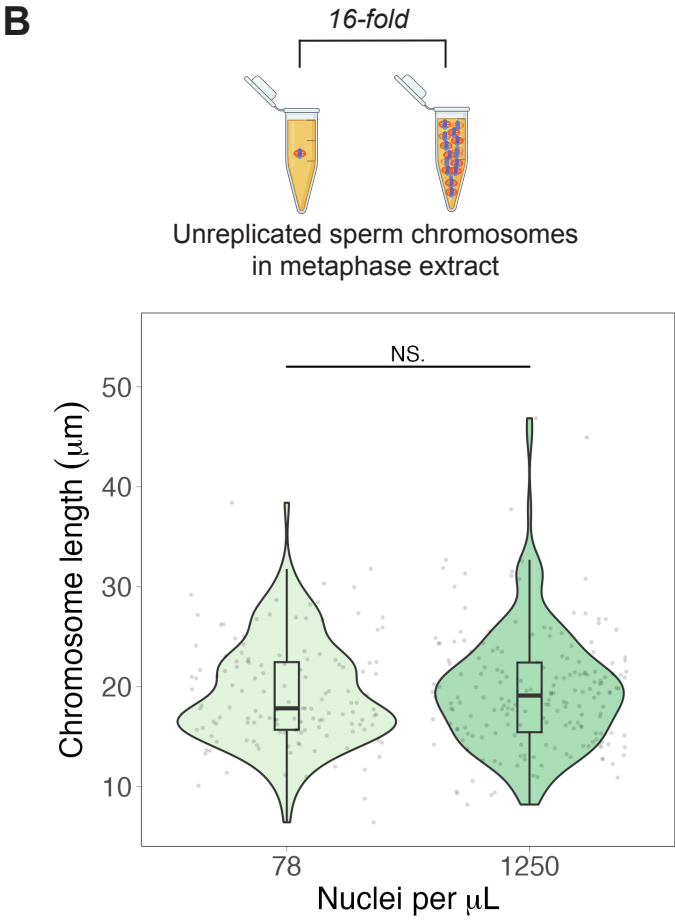

Supplement: supp [file elife-84360-supp-v1.zip]
