# Supplementary material for: Mitotic chromosomes scale to nuclear-cytoplasmic ratio and cell size in Xenopus
Source: eLife journal article supplement (doi:10.7554/elife.84360), 2023-04-25
Supplement: supp [file Figure 1-Source Data_summary.docx]

**This folder contains the following source data:**

Figure 1-Source Data 1.csv (dataframe used to make plots for Figure 1)

- Includes published data on interphase nuclei from Jevtić and Levy, *Current Biology* 2015.
