# Supplementary material for: Mitotic chromosomes scale to nuclear-cytoplasmic ratio and cell size in Xenopus
Source: eLife journal article supplement (doi:10.7554/elife.84360), 2023-04-25
Supplement: supp [file Figure 2-Source Data_summary.docx]

**This folder contains the following source data:**

Figure 2- Source Data 1.csv (dataframe used to make plots for Figure 2)

Figure 2- Source Data 2.csv (dataframe used to make plots for Figure 2- figure supplement 1)
