# Supplementary material for: Mitotic chromosomes scale to nuclear-cytoplasmic ratio and cell size in Xenopus
Source: eLife journal article supplement (doi:10.7554/elife.84360), 2023-04-25
Supplement: supp [file Figure 3-Source Data_summary.docx]

**This folder contains the following source data:**

Figure 3-Source Data 1.csv (all data used to make plots in Figure 3B, 3D, Figure 3—supplement 3)

Figure 3-Source Data 2.csv (all data used to make plot in Figure 3—figure supplement 1)

Figure 3-Source Data 3.csv (all data used to make plots in Figure 3—figure supplement 2A)

Figure 3-Source Data 4.csv (all data used to make plots in Figure 3—figure supplement 2B)

Figure 3-Source Data 5.csv (all data used to make plots in Figure 3—figure supplement 4)

Figure 3-Source Data 6.csv (all data used to make plots in Figure 3—figure supplement 5, 6)
