# Supplementary material for: Mitotic chromosomes scale to nuclear-cytoplasmic ratio and cell size in Xenopus
Source: eLife journal article supplement (doi:10.7554/elife.84360), 2023-04-25
Supplement: supp [file Figure 4-Source Data_summary.docx]

**This folder contains the following source data:**

Figure 4-Source Data 1.svg (entire, uncropped Hi-C maps of chromosome 4L, a portion of which was displayed in Figure 4A)

Figure 4-Source Data 2.csv (all data used to construct the plot in Figure 4B)

Figure 4-Source Data 3.csv (all data used to construct the plot in Figure 4C)

Raw Hi-C data can be accessed via GEO with the token GSE217111 and password yxavasoglngrvmj.
