# Supplementary material for: Mitotic chromosomes scale to nuclear-cytoplasmic ratio and cell size in Xenopus
Source: eLife journal article supplement (doi:10.7554/elife.84360), 2023-04-25
Supplement: supp [file Figure 5-Source Data 6C.xlsx]

## Sheet: Sheet1
Antibody	Frog	Stage	IntDen	RawIntDen	Normalized Int Den
H3	Frog 1	Stg 3	1.99871e+10	697669	96.1464
		Stg 9	2.07882e+10	725632	100
	Frog 2	Stg 3	1.7959e+10	626875	87.526
		Stg 9	2.05185e+10	716216	100
H1	Frog 1	Stg 3	1.17165e+11	4089760	100
		Stg 9	1.03167e+11	3601124	88.0522
	Frog 2	Stg 3	1.61413e+11	5634281	100
		Stg 9	1.61464e+11	5636049	100
x_CAPG	Frog 1	Stg 3	8.04799e+10	2809227	100
		Stg 9	8.2821e+10	2890944	97.1733
	Frog 2	Stg 3	8.79005e+10	3068248	100
		Stg 9	8.5404e+10	2981108	97.1599
Topo2	Frog 1	Stg 3	2.17483e+10	761862	88.5112
		Stg 9	2.45712e+10	860752	100
	Frog 2	Stg 3	2.78208e+10	974590	91.884
		Stg 9	3.02782e+10	1060674	100
