# Supplementary figures and images for: Mitotic chromosomes scale to nuclear-cytoplasmic ratio and cell size in Xenopus
Source: eLife journal article supplement (doi:10.7554/elife.84360), 2023-04-25

**Figure 1-figure supplement 2: Scaling of spindle length vs. width to cell size.**

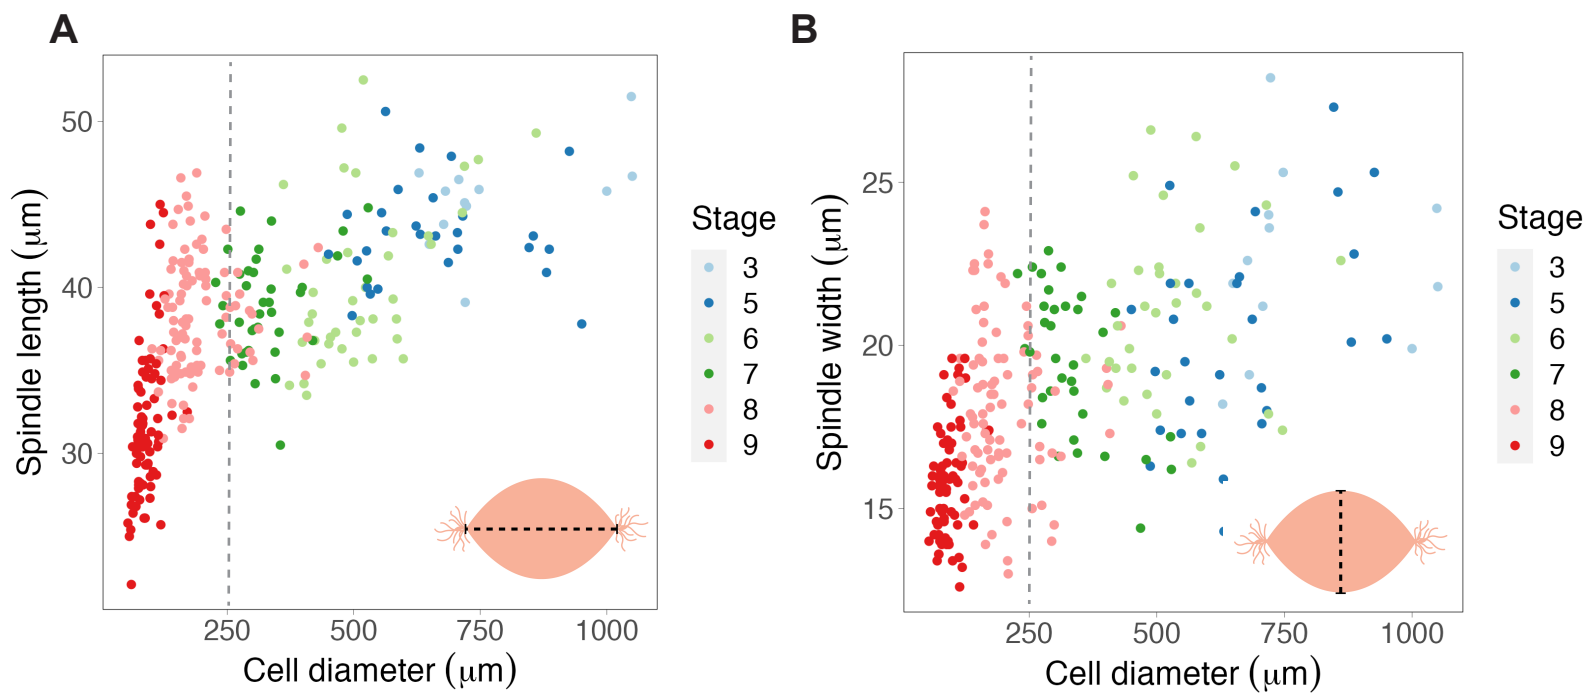

Supplement: supp [file elife-84360-supp-v1.zip]

**Figure 3-figure supplement 6: Raw fluorescence intensities for anaphase experiments.**

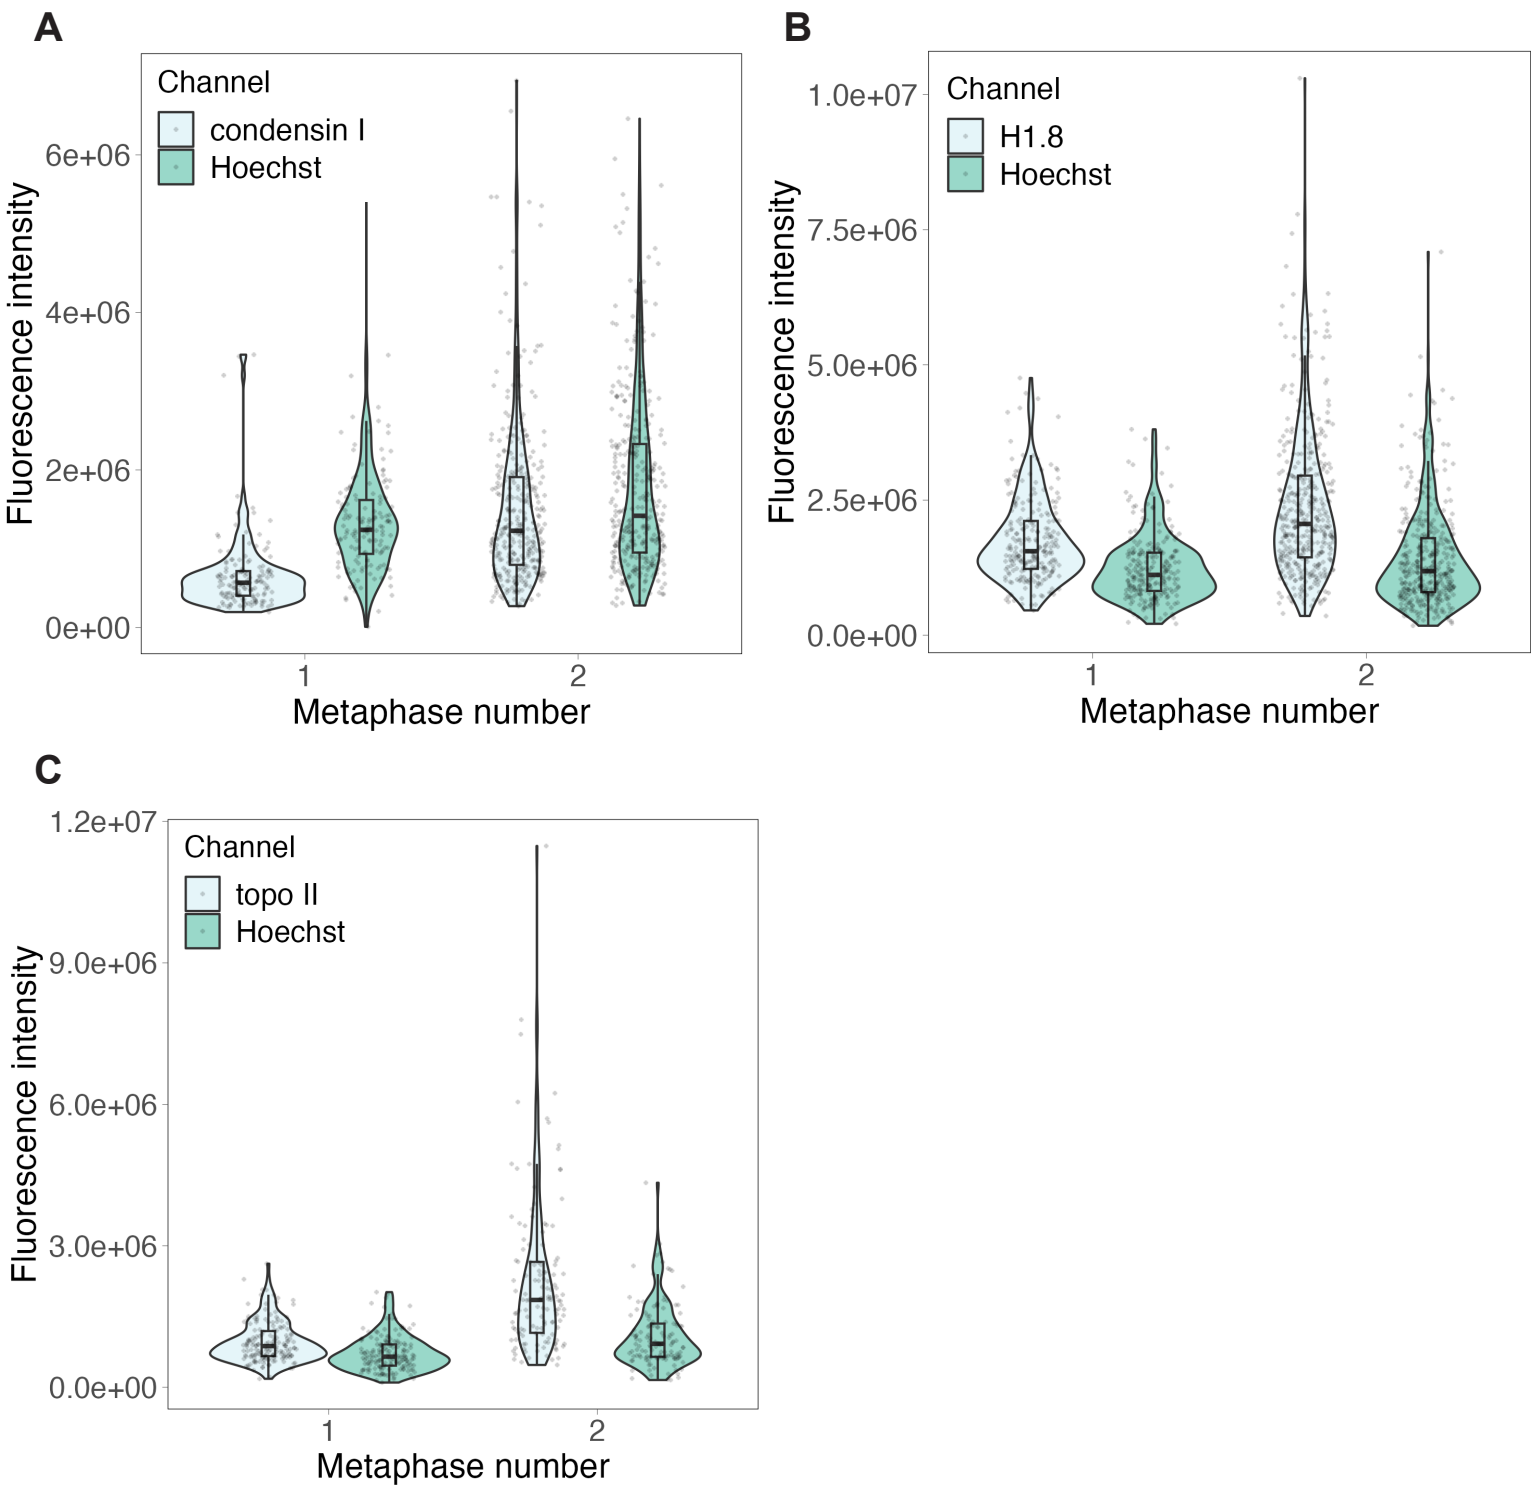

Supplement: supp [file elife-84360-supp-v1.zip]

**Figure 1-figure supplement 4: Metaphase plates scale similarly with both nuclei and spindles.**

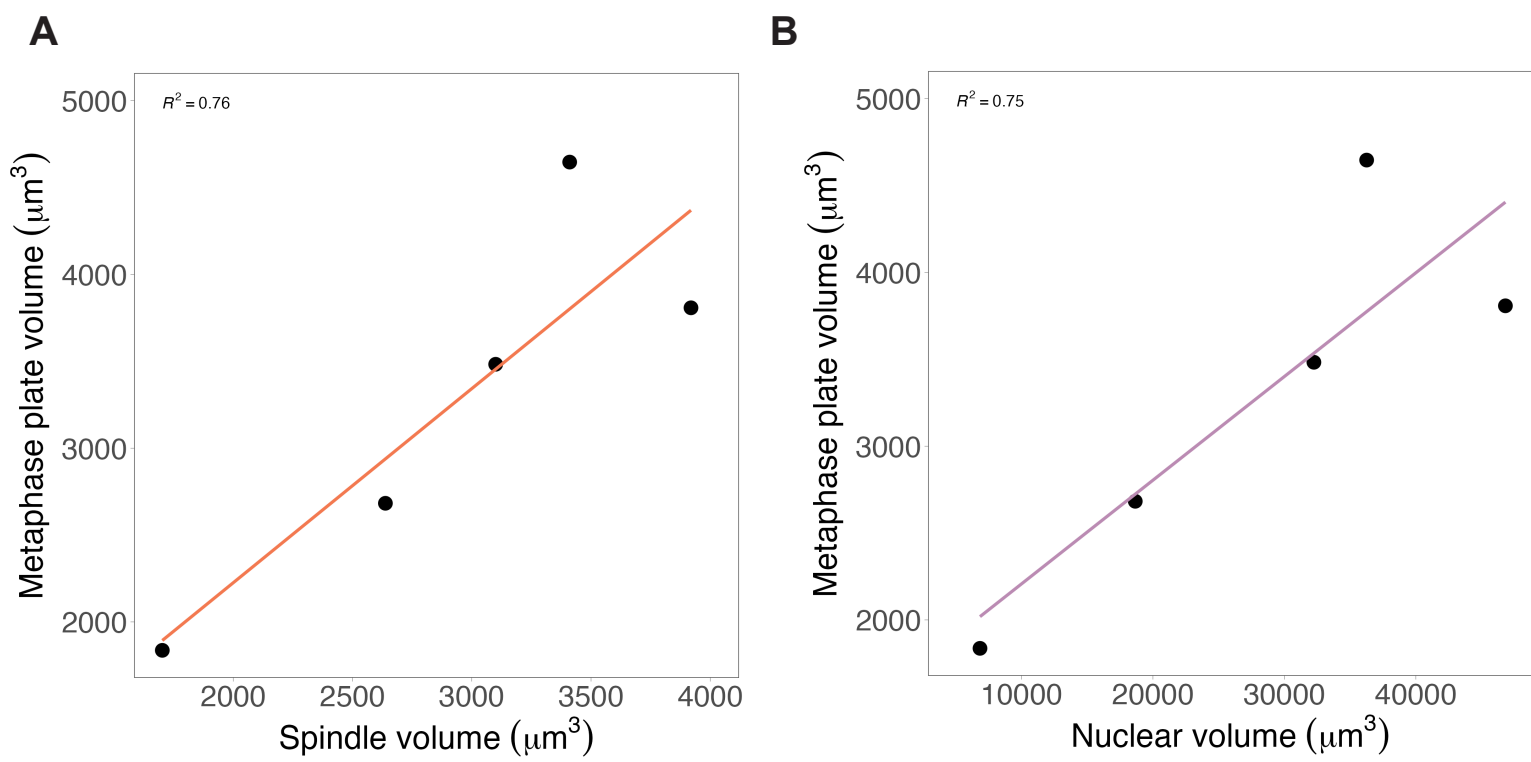

Supplement: supp [file elife-84360-supp-v1.zip]

**Figure 3-figure supplement 1: Clarified egg extracts support mitotic chromosome scaling.**

**A**

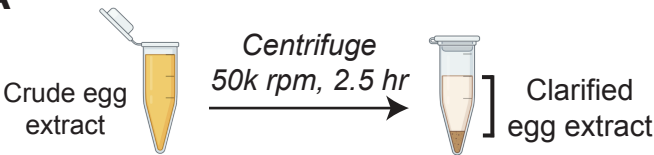

**B**

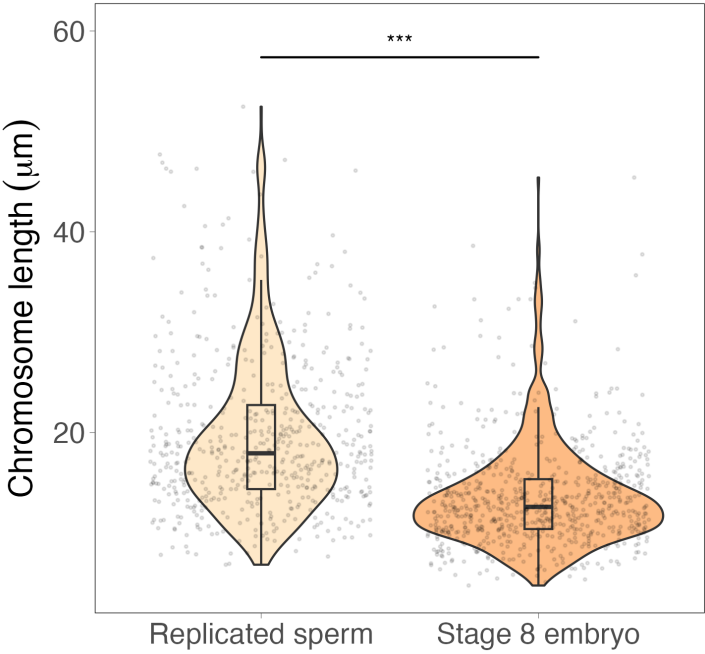

Supplement: supp [file elife-84360-supp-v1.zip]

**Figure 5-figure supplement 1: Titration of topo II and H1.8, and H3 on mitotic chromosomes.**

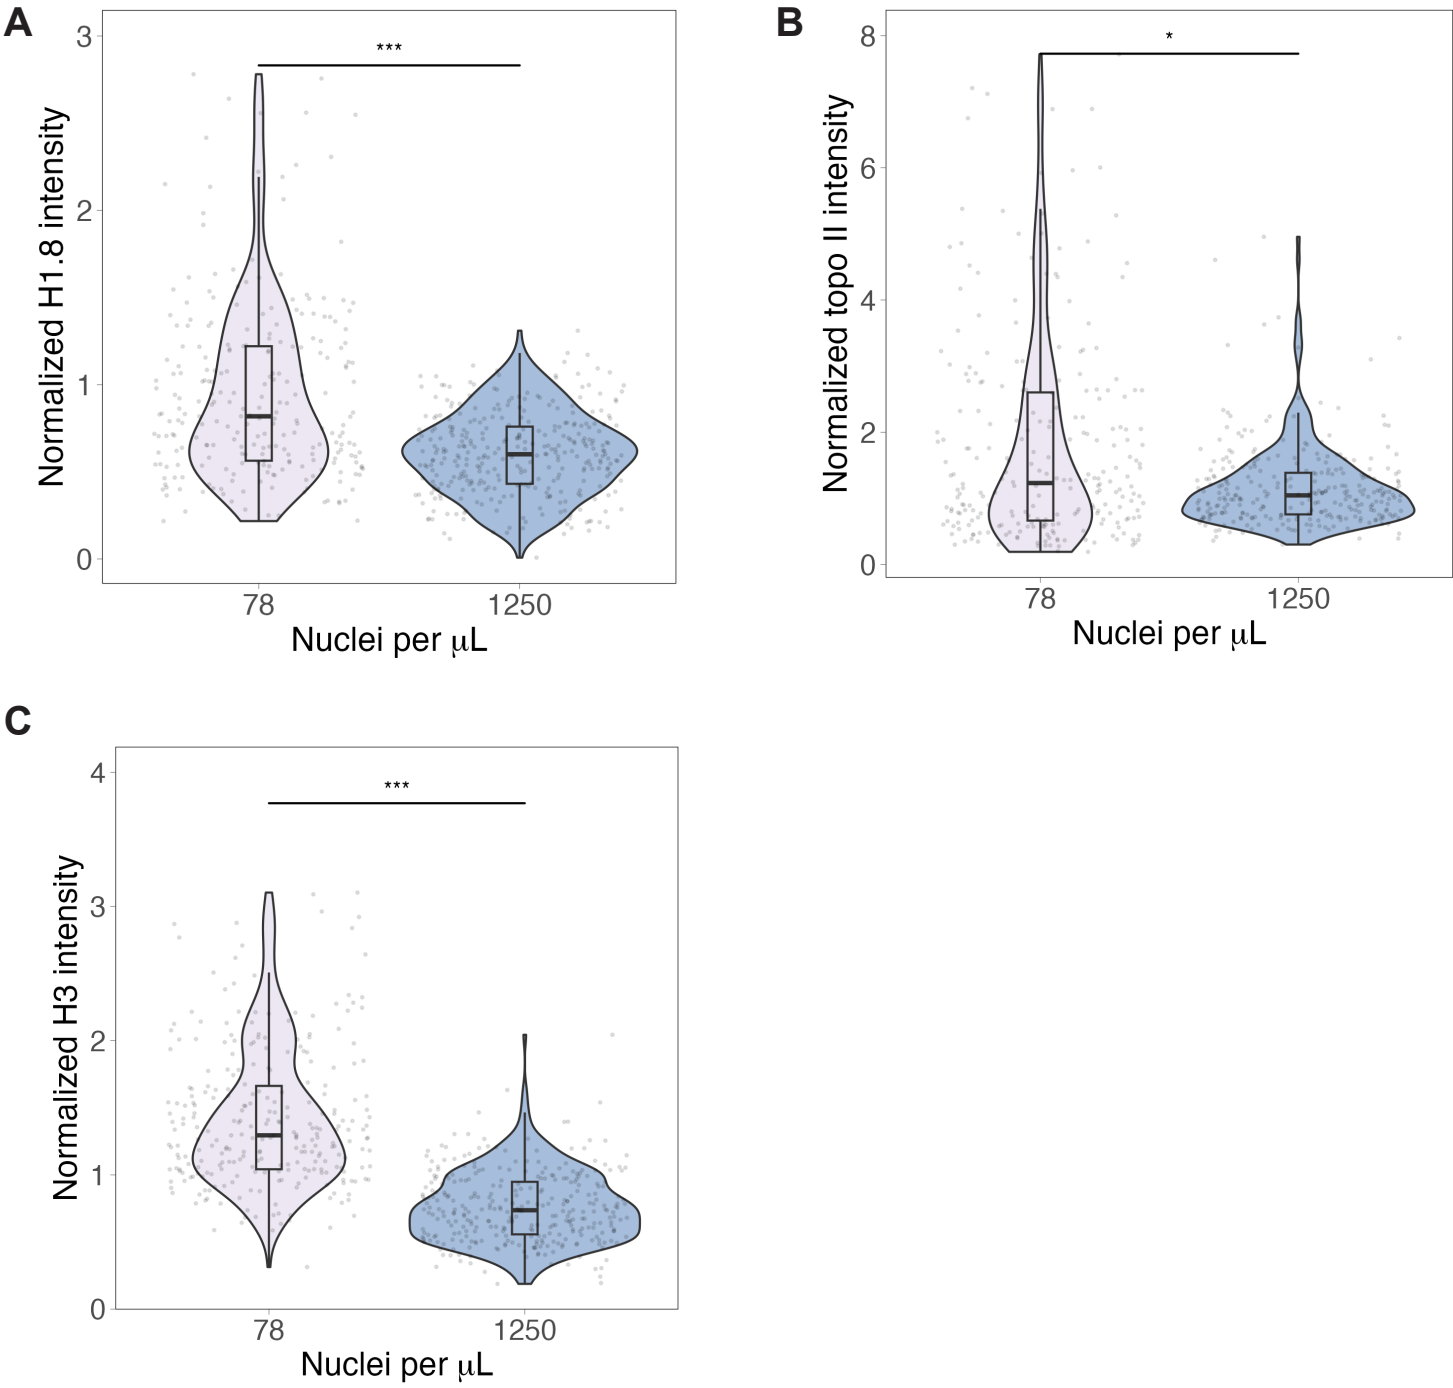

Supplement: supp [file elife-84360-supp-v1.zip]

**Figure 5-figure supplement 2: Raw fluorescence intensities for N/C ratio experiments.**

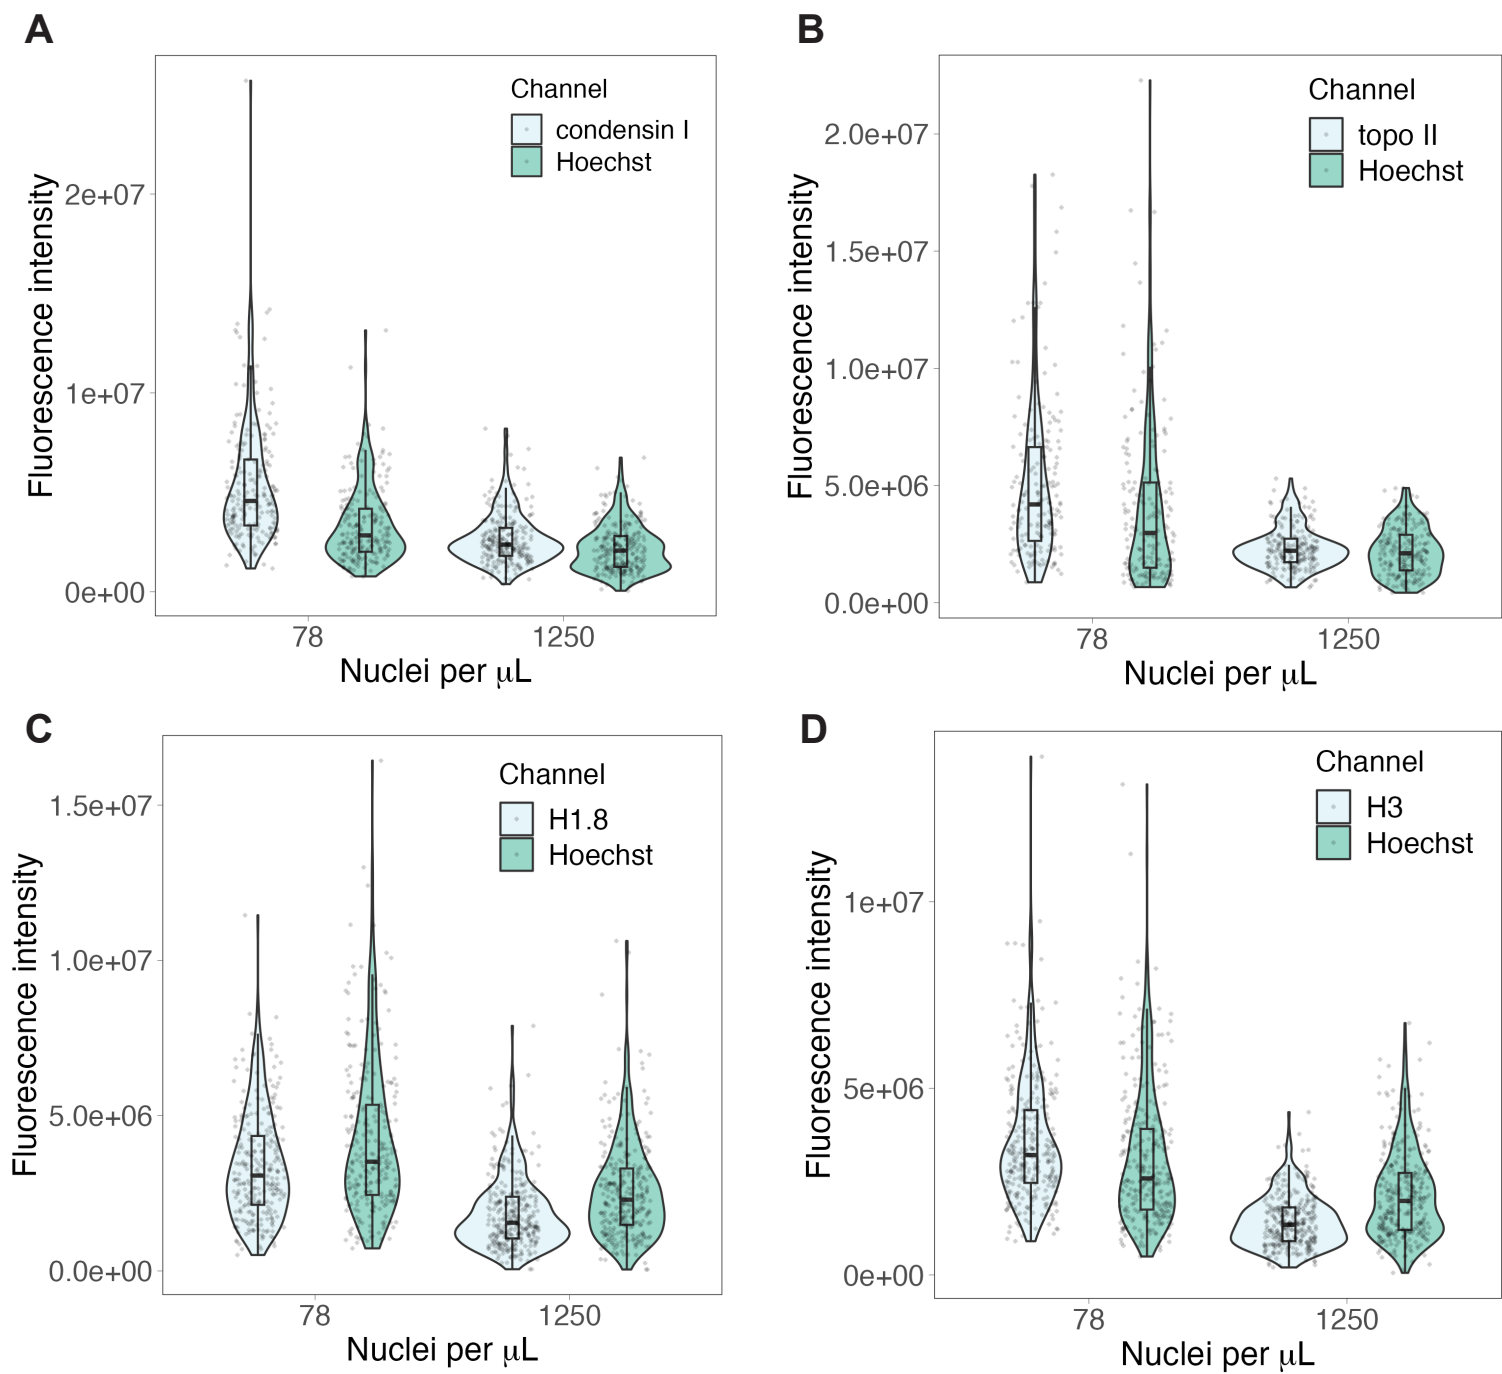

Supplement: supp [file elife-84360-supp-v1.zip]

**Figure 1-figure supplement 3:** Nuclear volumes scale continuously with cell size.

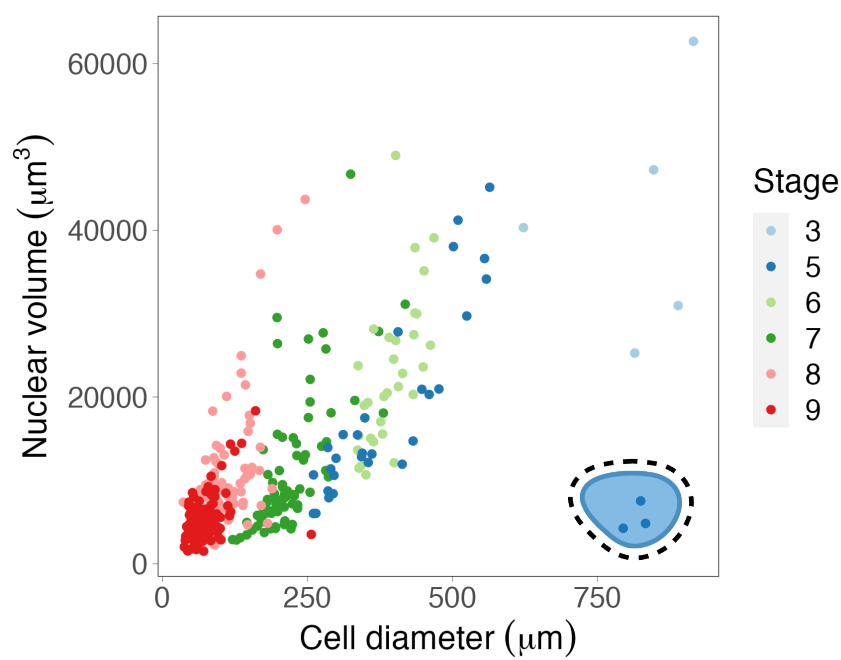

Supplement: supp [file elife-84360-supp-v1.zip]

**Figure 6-figure supplement 1: Raw fluorescence intensities for palmostatin experiments.**

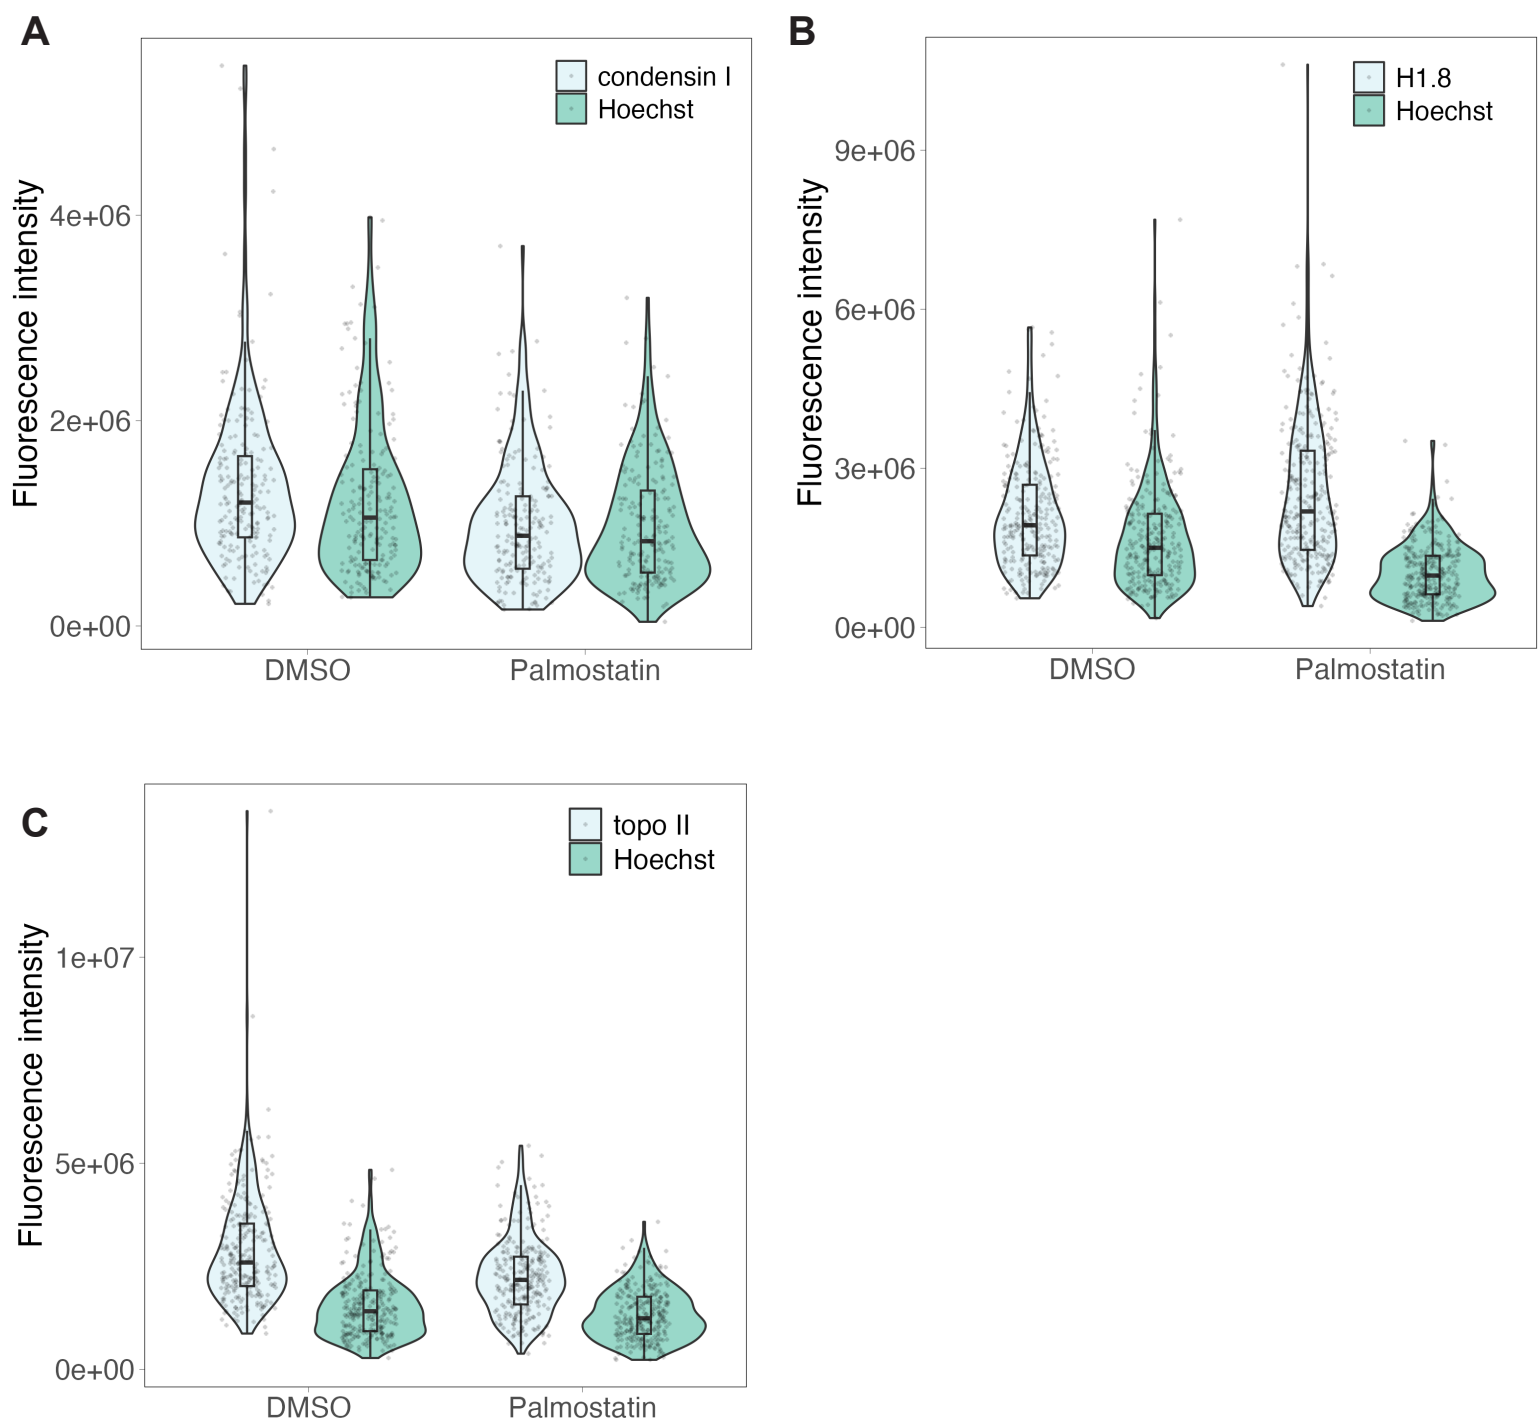

Supplement: supp [file elife-84360-supp-v1.zip]

# High intensity scan

x-CAP-G

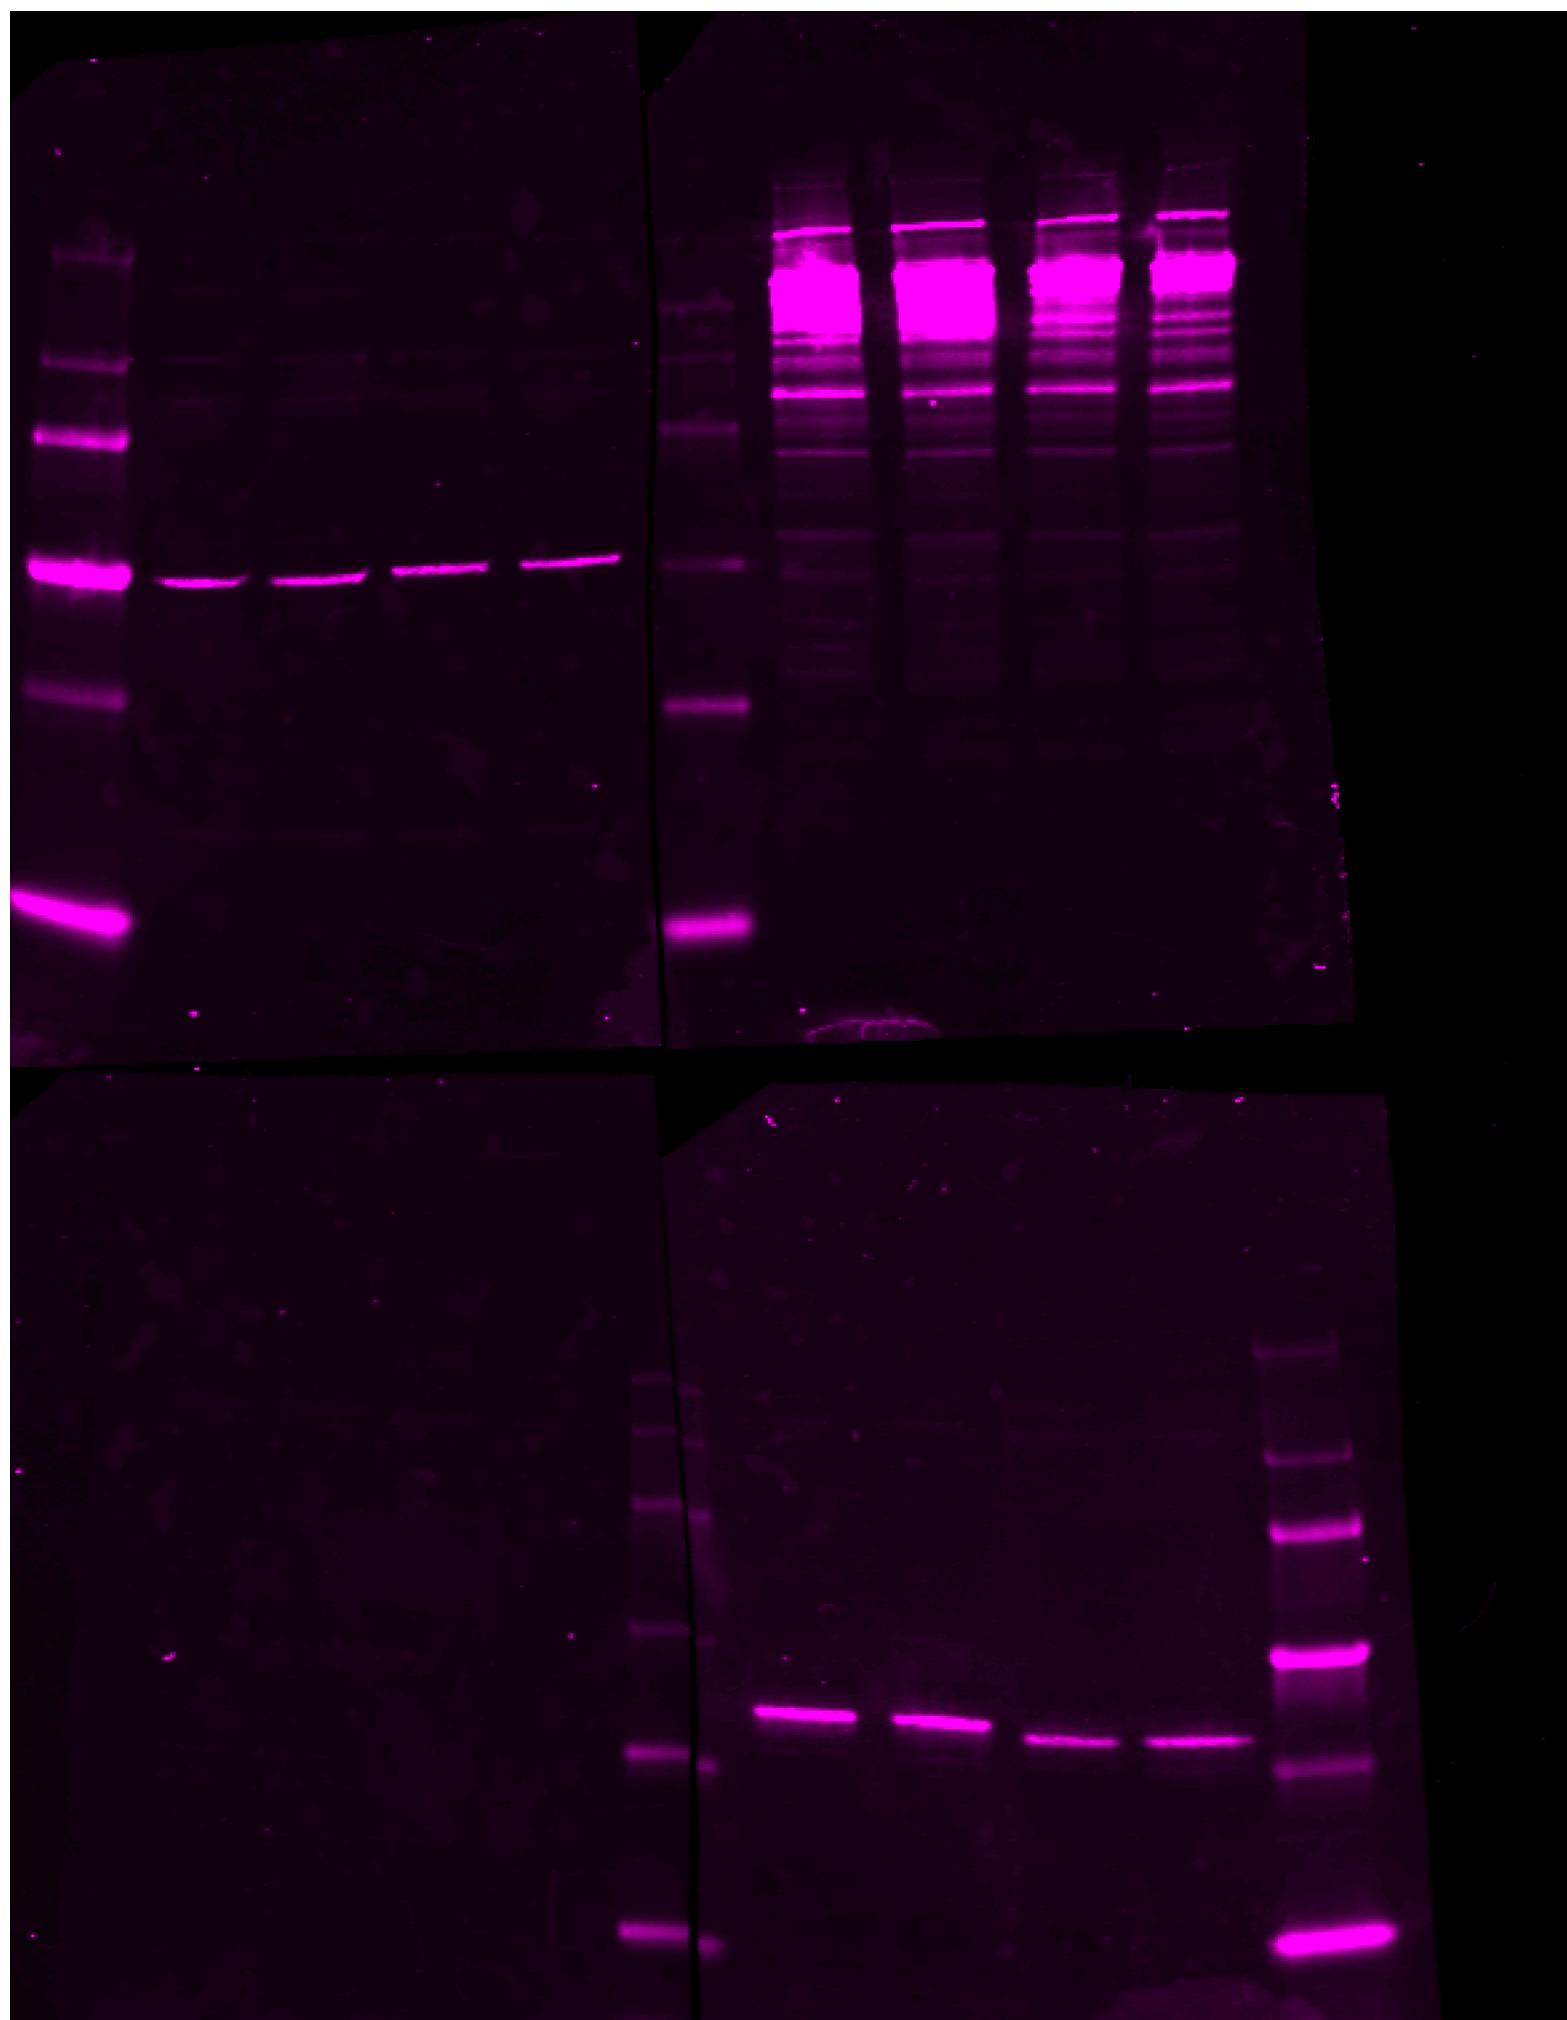

Topo2

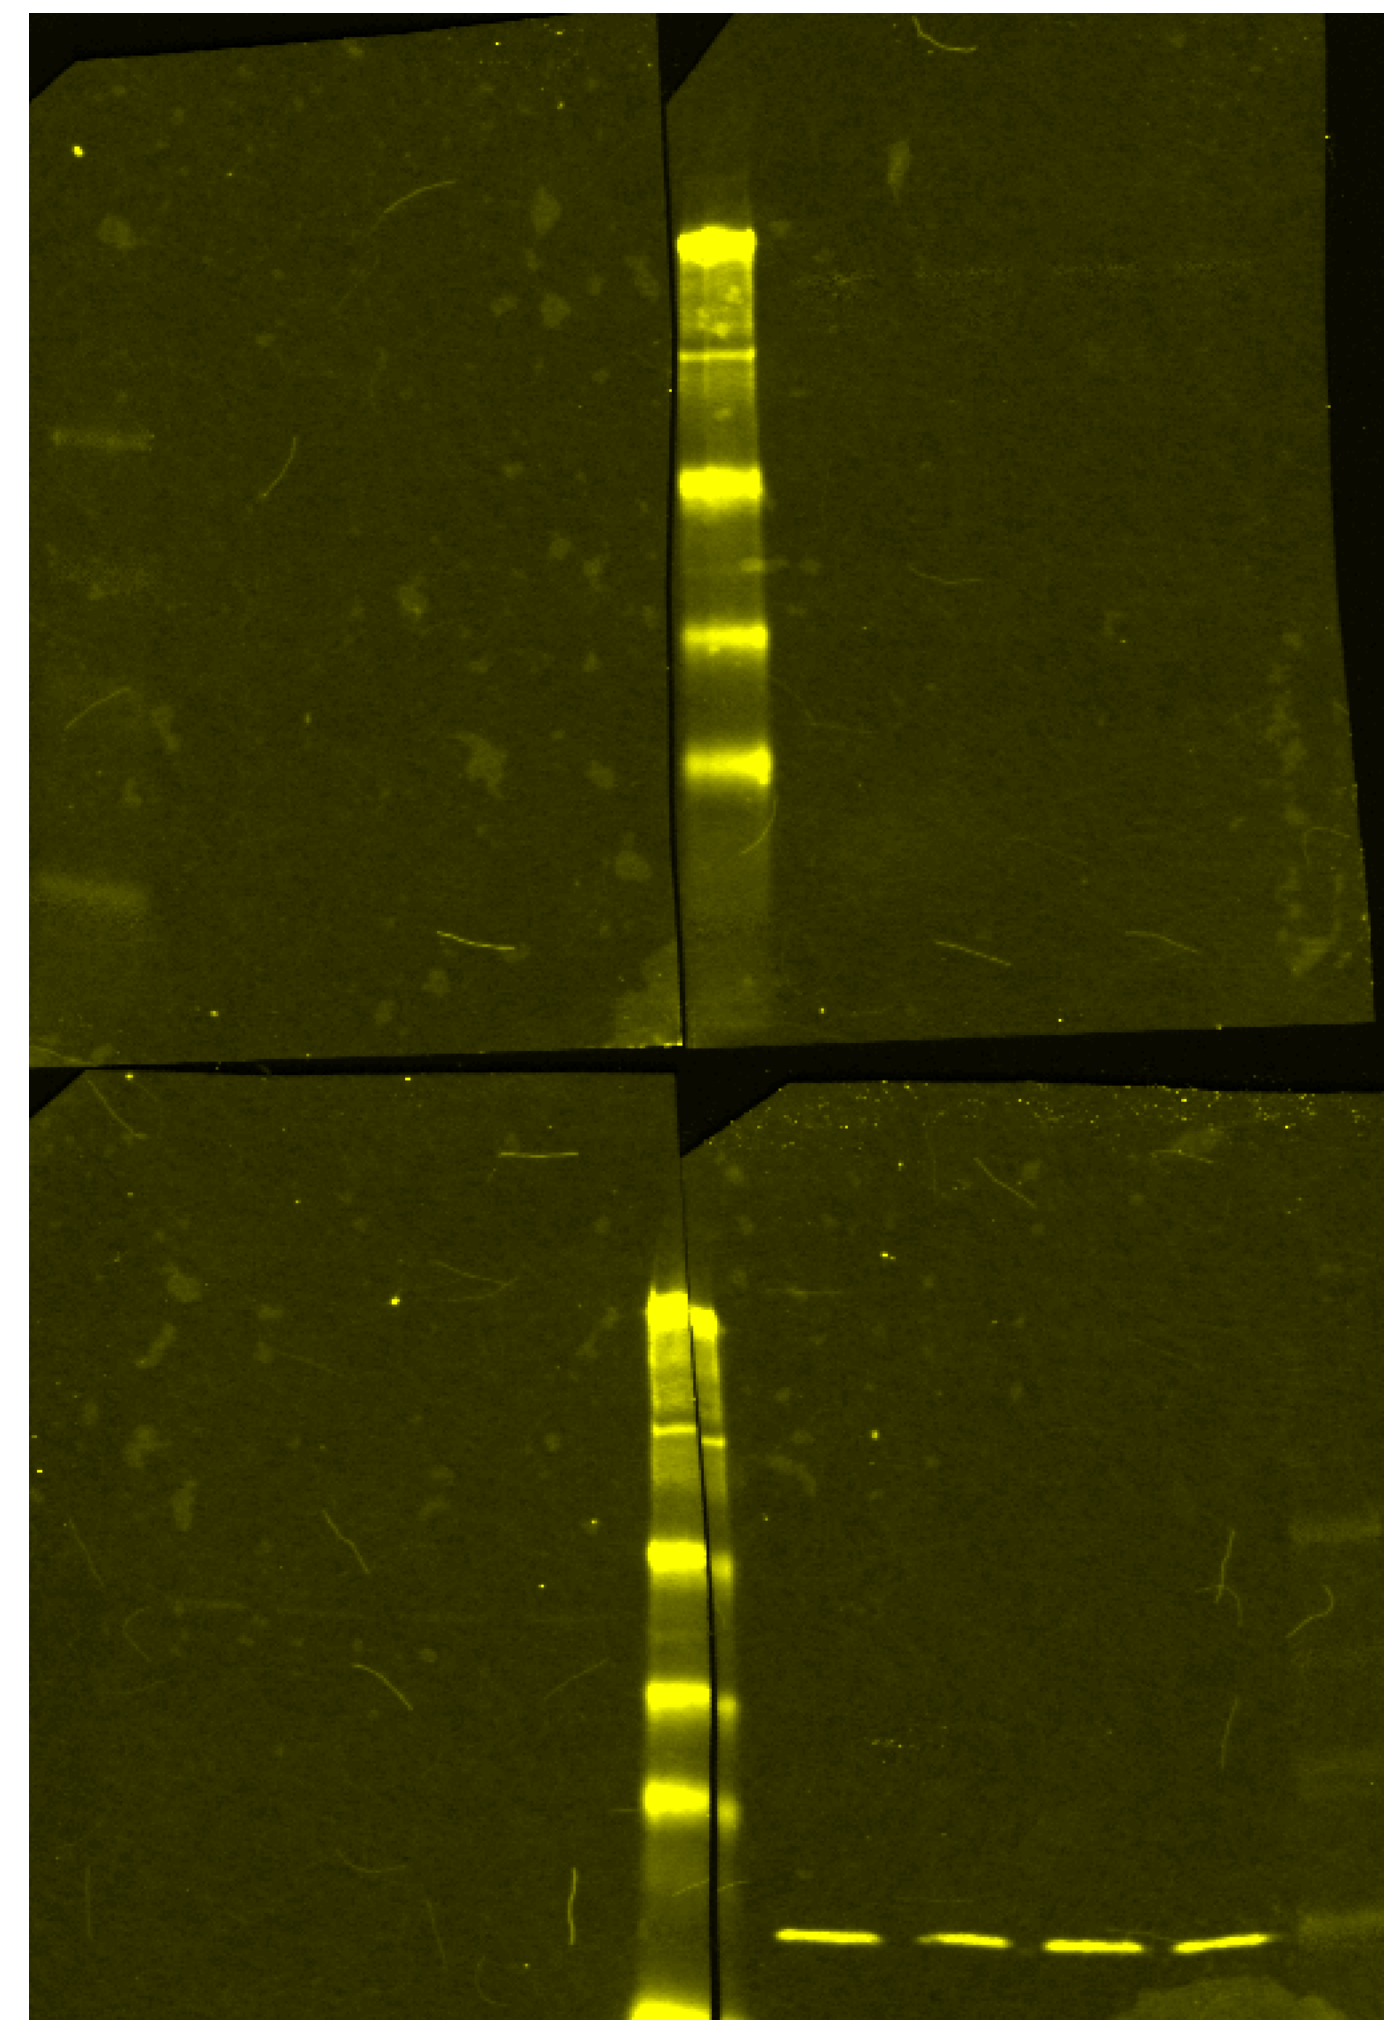

H3

# Low intensity scan

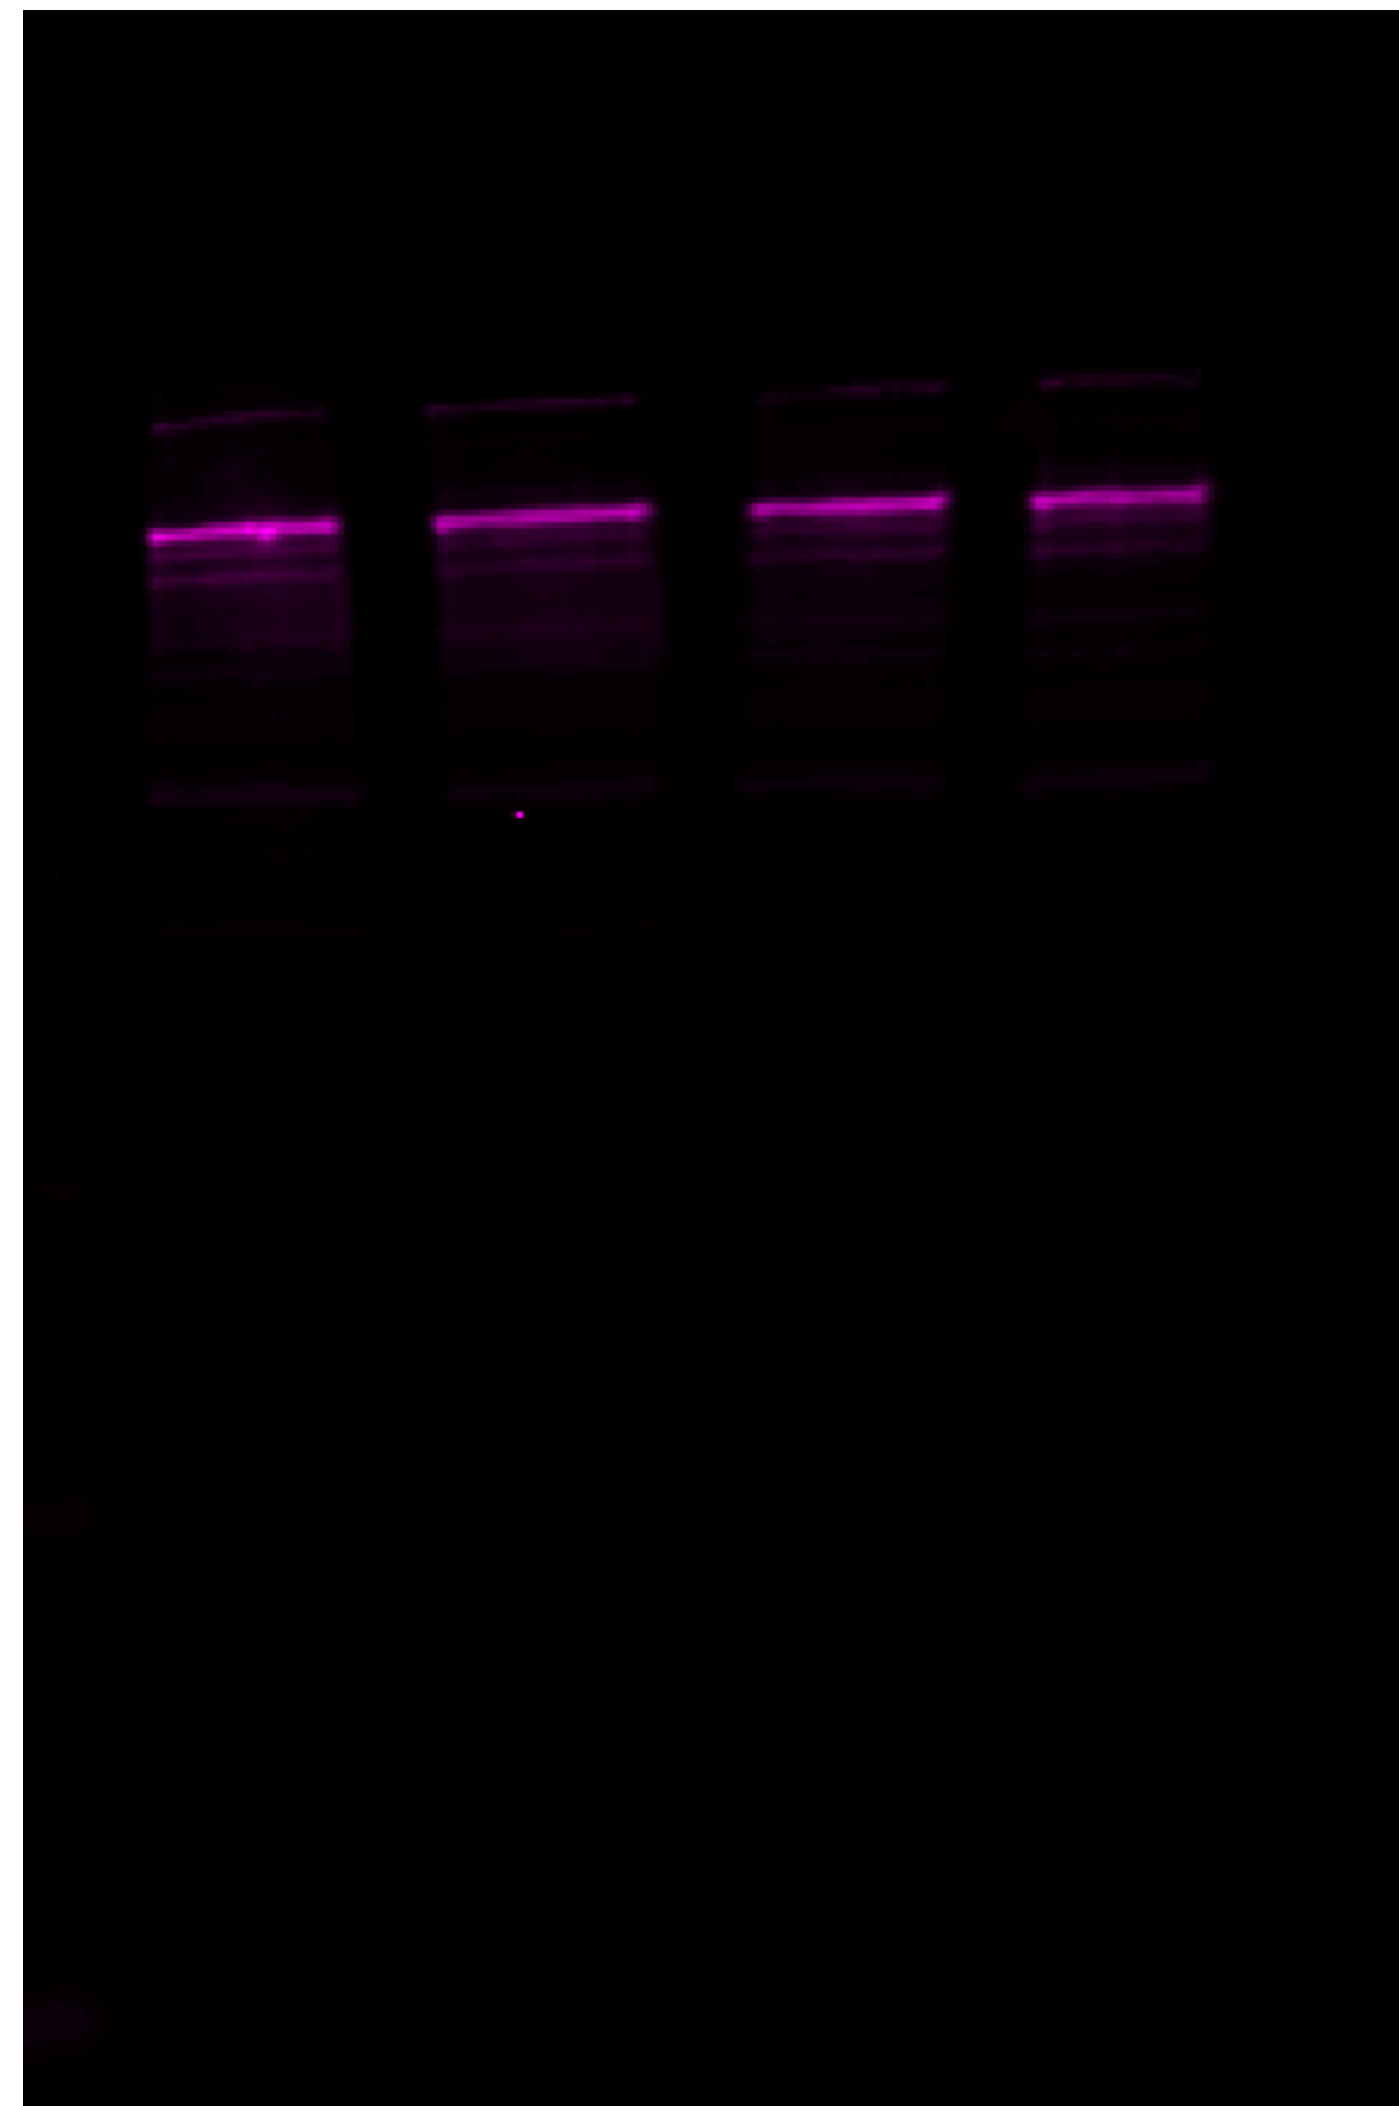

Topo2

Supplement: supp [file elife-84360-supp-v1.zip]

**Figure 1-figure supplement 1: 3D segmentation of mitotic spindles.**

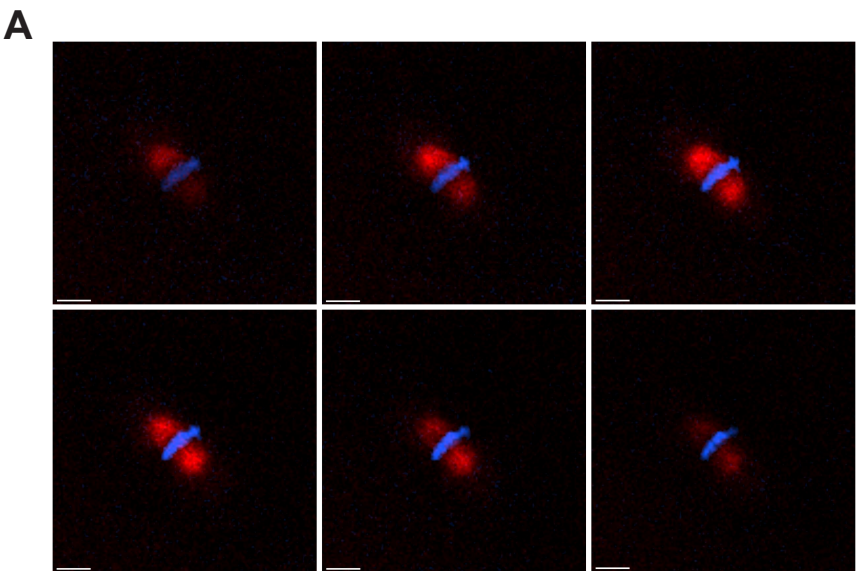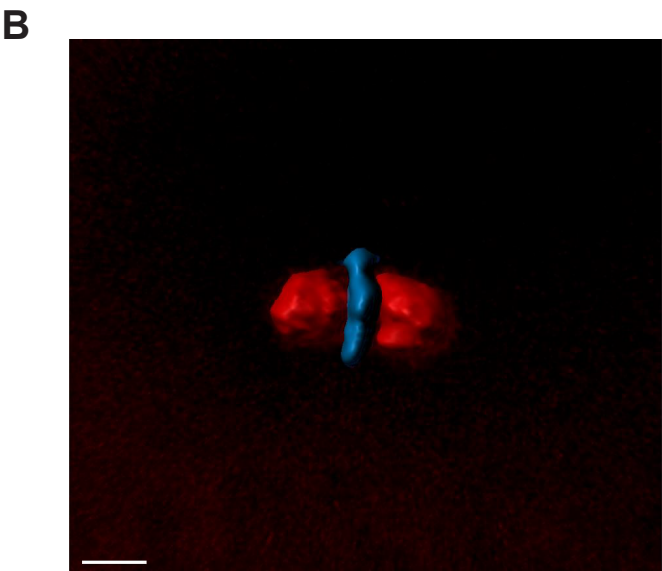

Supplement: supp [file elife-84360-supp-v1.zip]

**Figure 5-figure supplement 4: Titration of chromatin factors during embryogenesis.**

**A**

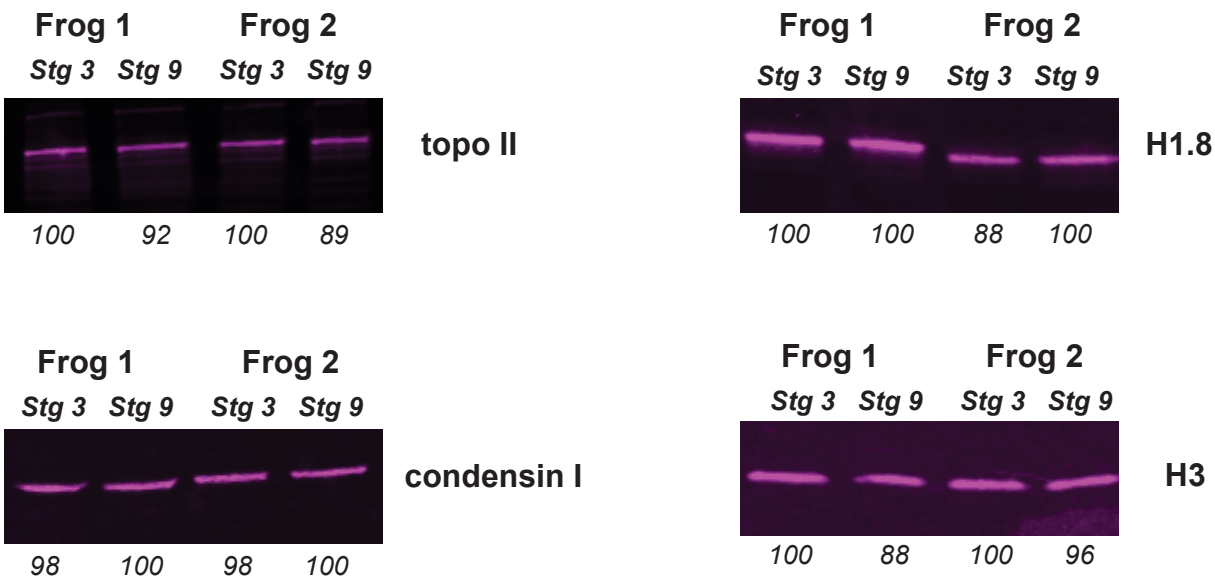

**B**

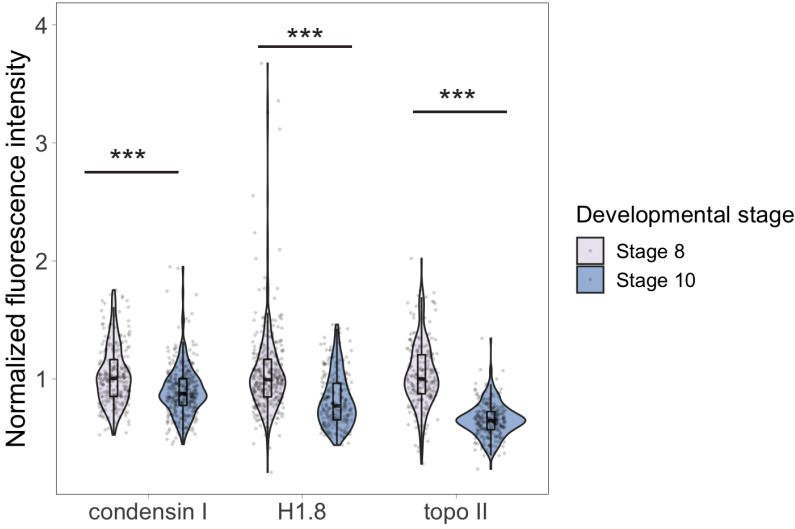

Supplement: supp [file elife-84360-supp-v1.zip]
